# Supplementary figures and images for: BRF1 mutations alter RNA polymerase III–dependent transcription and cause neurodevelopmental anomalies
Source: PubMed Central journal article supplement — Genome Res. 2015 Feb;25(2):155–66. doi: 10.1101/gr.176925.114 (PMC4315290; doi:10.1101/gr.176925.114), 2015-02

### Family 1

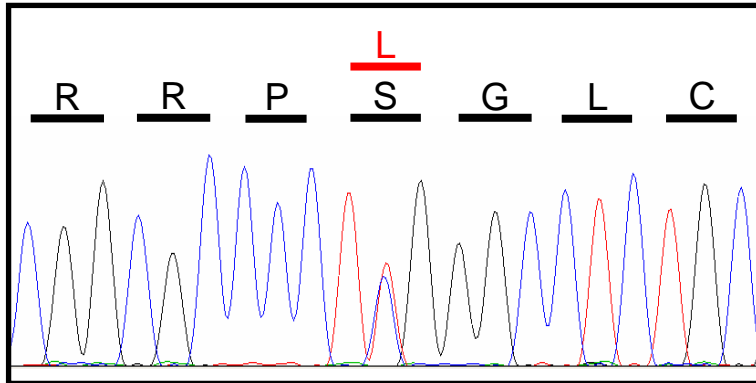

c.677C>T (p.Ser226Leu)

### Family 2

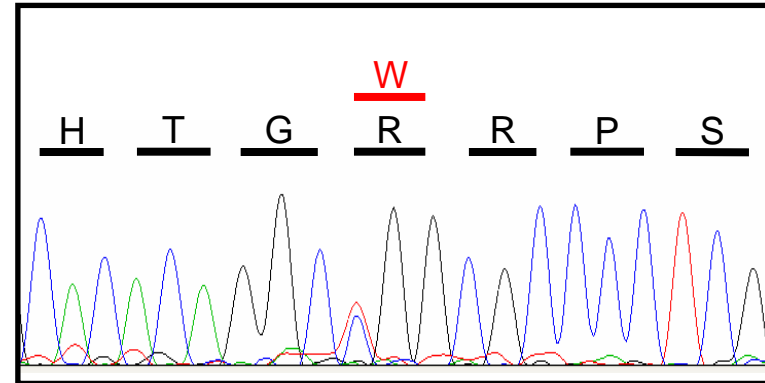

c.667C>T (p.Arg223Trp)

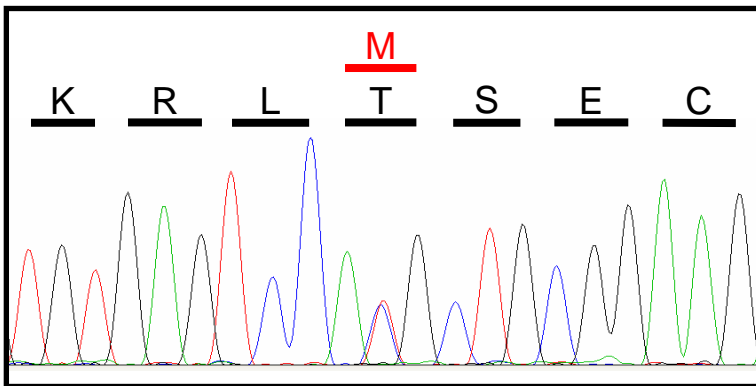

c.776C>T (p.Thr259Met)

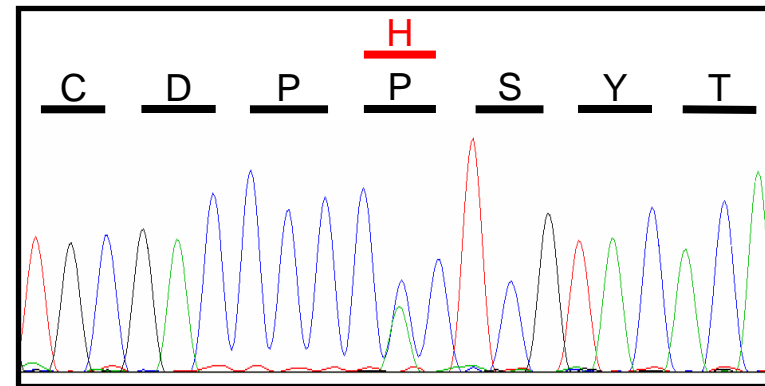

c.875C>A (p.Pro292His)

Supplement: supp_gr.176925.114_Supplemental_Fig_1.pdf [file supp_gr.176925.114_Supplemental_Fig_1.pdf]

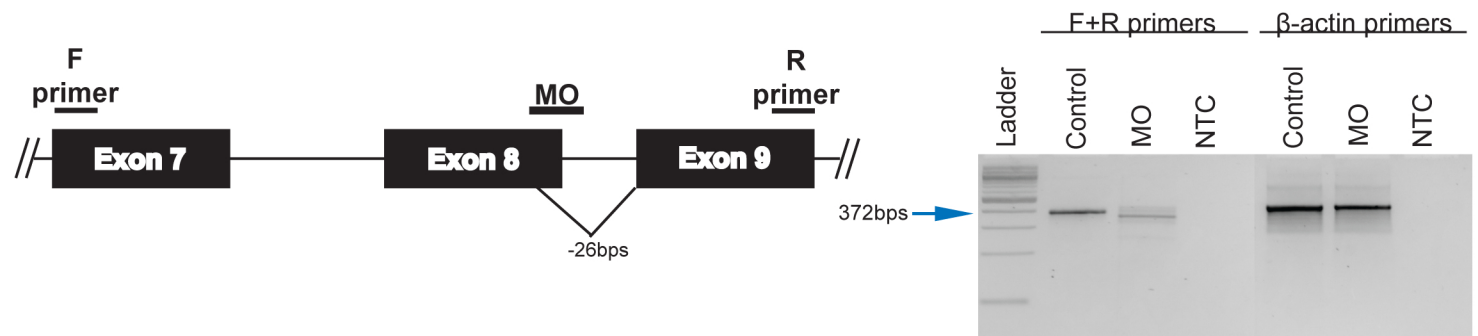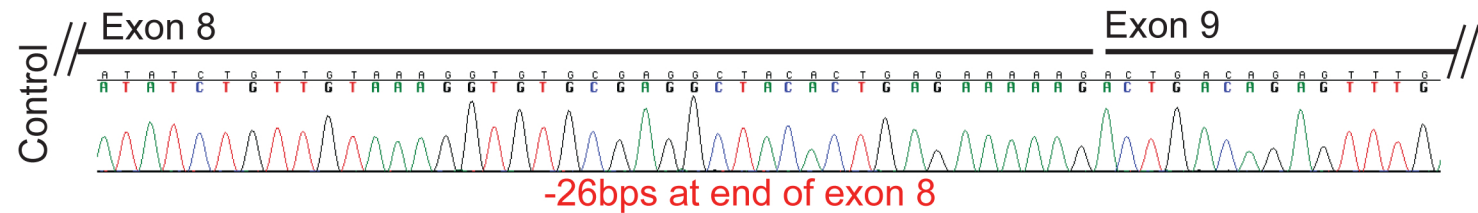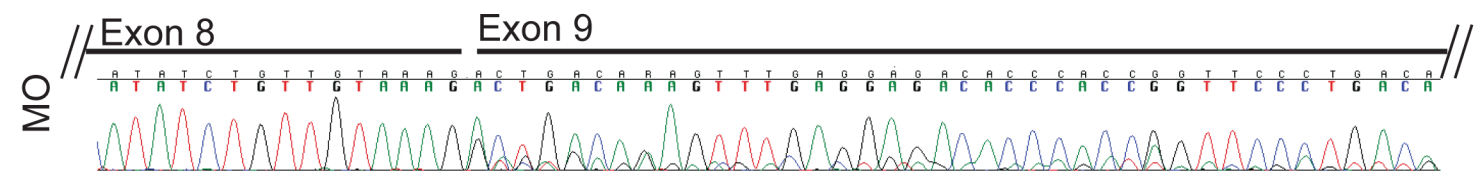

Supplement: supp_gr.176925.114_Supplemental_Fig_2.pdf [file supp_gr.176925.114_Supplemental_Fig_2.pdf]

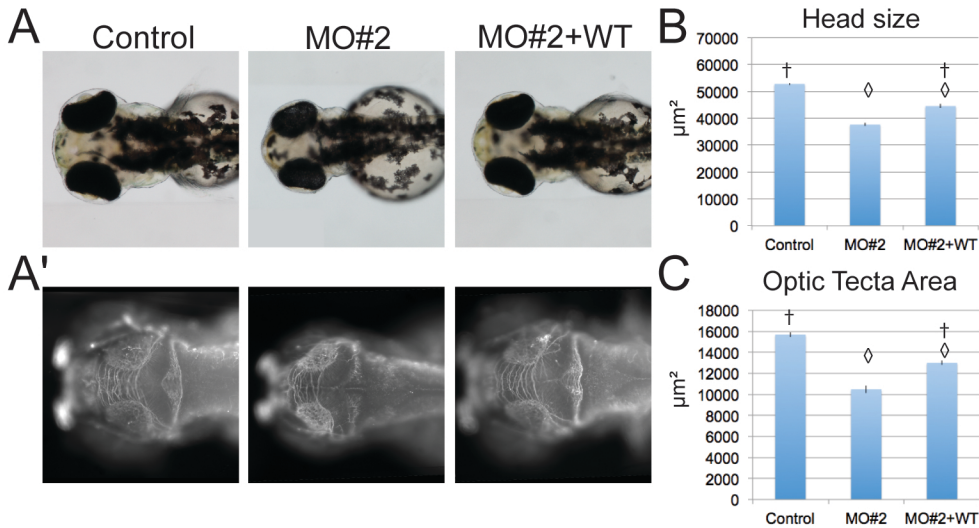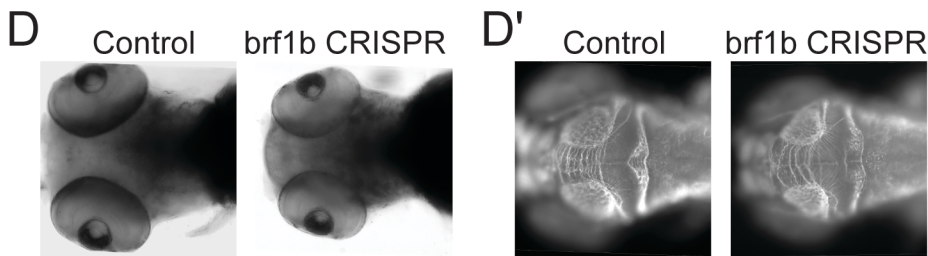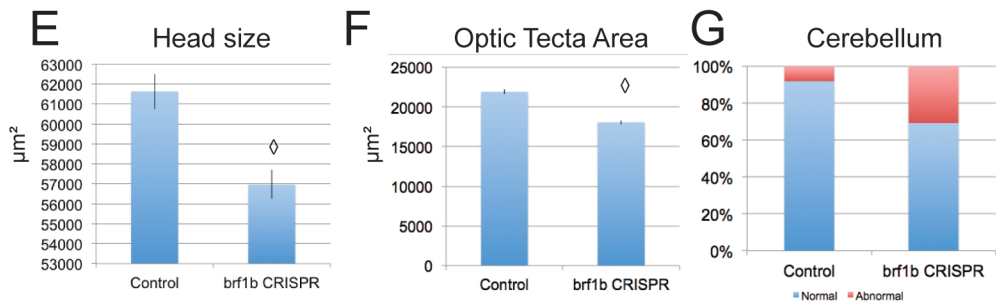

Supplement: supp_gr.176925.114_Supplemental_Fig_3.pdf [file supp_gr.176925.114_Supplemental_Fig_3.pdf]
